# Supplementary material for: Topological modulation of metal–thiadiazole dicarboxylate coordination polymers through auxiliary ligand alteration
Source: Royal Society of Chemistry journal article supplement (doi:10.1039/c5ce00649j), 2015-01-01
Supplement: c5ce00649j1.pdf [file c5ce00649j1.pdf]

## ***Electronic Supplementary Information (ESI)***

### **Topological Modulation of Metal-thiadiazole Dicarboxylate Coordination Polymers through Auxiliary Ligand Alteration**

**Zhen-Xin Zhao,<sup>ab</sup> Yun-Wu Li,<sup>b</sup> Sui-Jun Liu,<sup>b</sup> Li-Fu Wang,<sup>b</sup> Ze Chang,<sup>b</sup> Jian Xu<sup>\*b</sup> and Ying-Hui Zhang<sup>\*b</sup>**

*<sup>a</sup>Chemical and Materials Engineering, Henan University of Urban Construction, Pingdingshan 467036, Henan Province, P. R. China*

*<sup>b</sup>Key Laboratory of Advanced Energy Materials Chemistry (Ministry of Education), Collaborative Innovation Center of Chemical Science and Engineering (Tianjin), Nankai University, Tianjin 300071, P. R. China*

---

\*Corresponding author. E-mail: [jxu@nankai.edu.cn](mailto:jxu@nankai.edu.cn), [zhangyhi@nankai.edu.cn](mailto:zhangyhi@nankai.edu.cn) Fax: +86-22-23502458.

**Table S1.** Selected bond lengths (Å) and angles (°) for **1<sup>a</sup>**

|                           |            |                         |           |
|---------------------------|------------|-------------------------|-----------|
| Co1—O2                    | 2.052(2)   | Co1—O3                  | 2.086(2)  |
| Co1—O4 <sup>#1</sup>      | 2.0860(19) | Co1—N2                  | 2.172(2)  |
| Co1—O1W                   | 2.087(2)   | Co1—N1                  | 2.178(2)  |
| O2—Co1—O4 <sup>#1</sup>   | 172.52(8)  | O1W—Co1—N2              | 87.90(9)  |
| O2—Co1—O1W                | 84.21(8)   | O3—Co1—N2               | 90.94(9)  |
| O4 <sup>#1</sup> —Co1—O1W | 100.69(8)  | O2—Co1—N1               | 88.39(9)  |
| O2—Co1—O3                 | 89.93(8)   | O4 <sup>i</sup> —Co1—N1 | 85.85(9)  |
| O4 <sup>#1</sup> —Co1—O3  | 85.33(7)   | O1W—Co1—N1              | 91.47(9)  |
| O1W—Co1—O3                | 173.84(8)  | O3—Co1—N1               | 90.27(9)  |
| O2—Co1—N2                 | 97.06(9)   | N2—Co1—N1               | 174.42(9) |
| O4 <sup>#1</sup> —Co1—N2  | 88.81(9)   |                         |           |

<sup>a</sup>Symmetry code: #1:  $-x+1/2, y-1/2, -z+1/2$ .

**Table S2.** Selected bond lengths (Å) and angles (°) for **2<sup>a</sup>**

|           |           |           |            |
|-----------|-----------|-----------|------------|
| Co1—O4    | 2.098(2)  | Co1—N3    | 2.136(3)   |
| Co1—N4    | 2.114(3)  | Co1—O5    | 2.149(3)   |
| Co1—O1    | 2.120(2)  | Co1—N2    | 2.197(3)   |
| O4—Co1—N4 | 88.51(9)  | O1—Co1—O5 | 88.13(11)  |
| O4—Co1—O1 | 172.67(9) | N3—Co1—O5 | 173.77(13) |
| N4—Co1—O1 | 90.19(9)  | O4—Co1—N2 | 104.59(9)  |
| O4—Co1—N3 | 91.28(10) | N4—Co1—N2 | 166.56(9)  |
| N4—Co1—N3 | 89.92(10) | O1—Co1—N2 | 76.43(9)   |
| O1—Co1—N3 | 95.93(10) | N3—Co1—N2 | 92.72(10)  |
| O4—Co1—O5 | 84.79(11) | O5—Co1—N2 | 83.62(10)  |
| N4—Co1—O5 | 94.80(11) |           |            |

**Table S3.** Selected bond lengths (Å) and angles (°) for **3<sup>a</sup>**

|                                        |          |                          |           |
|----------------------------------------|----------|--------------------------|-----------|
| Zn1—O3 <sup>#1</sup>                   | 2.002(8) | Zn1—N3                   | 2.105(10) |
| Zn1—O1W                                | 2.031(9) | Zn1—O2 <sup>#1</sup>     | 2.181(8)  |
| Zn1—O1                                 | 2.054(8) | Zn1—N1                   | 2.408(10) |
| O3 <sup>#1</sup> —Zn1—O1W              | 86.5(3)  | O1—Zn1—O2 <sup>#1</sup>  | 86.6(4)   |
| O3 <sup>#1</sup> —Zn1—O1               | 168.1(3) | N3—Zn1—O2 <sup>#1</sup>  | 87.3(4)   |
| O1W—Zn1—O1                             | 98.0(4)  | O3 <sup>#1</sup> —Zn1—N1 | 96.2(3)   |
| O3 <sup>#1</sup> —Zn1—N3               | 97.1(4)  | O1W—Zn1—N1               | 92.5(4)   |
| O1W—Zn1—N3                             | 98.9(4)  | O1—Zn1—N1                | 72.7(3)   |
| O1—Zn1—N3                              | 93.1(4)  | N3—Zn1—N1                | 163.0(4)  |
| O3 <sup>#1</sup> —Zn1—O2 <sup>#1</sup> | 87.7(3)  | O2 <sup>#1</sup> —Zn1—N1 | 82.6(3)   |
| O1W—Zn1—O2 <sup>#1</sup>               | 172.0(4) |                          |           |

<sup>a</sup>Symmetry code: #1:  $x, -y+1, z+1/2$ .

**Table S4.** Selected bond lengths (Å) and angles (°) for **4<sup>a</sup>**

|                          |          |                                        |          |
|--------------------------|----------|----------------------------------------|----------|
| Zn1—O2                   | 2.004(6) | Zn1—O6                                 | 2.045(6) |
| Zn1—O1W                  | 2.032(6) | Zn1—O3                                 | 2.093(6) |
| Zn1—O4 <sup>#1</sup>     | 2.038(5) | Zn1—N2 <sup>#1</sup>                   | 2.534(7) |
| O2—Zn1—O1W               | 86.2(2)  | O4 <sup>#1</sup> —Zn1—O3               | 88.9(2)  |
| O2—Zn1—O4 <sup>#1</sup>  | 167.0(2) | O6—Zn1—O3                              | 84.3(2)  |
| O1W—Zn1—O4 <sup>#1</sup> | 94.6(2)  | O2—Zn1—N2 <sup>#1</sup>                | 96.0(2)  |
| O2—Zn1—O6                | 101.6(3) | O1W—Zn1—N2 <sup>#1</sup>               | 93.6(3)  |
| O1W—Zn1—O6               | 100.5(3) | O4 <sup>#1</sup> —Zn1—N2 <sup>#1</sup> | 71.0(2)  |
| O4 <sup>#1</sup> —Zn1—O6 | 90.9(3)  | O6—Zn1—N2 <sup>#1</sup>                | 158.0(2) |
| O2—Zn1—O3                | 89.2(2)  | O3—Zn1—N2 <sup>#1</sup>                | 82.8(2)  |
| O1W—Zn1—O3               | 174.0(3) |                                        |          |

<sup>a</sup>Symmetry code: #1:  $x, -y+1/2, z-1/2$ .

**Table S5.** Selected bond lengths (Å) and angles (°) for **5<sup>a</sup>**

|                          |            |                                        |            |
|--------------------------|------------|----------------------------------------|------------|
| Zn1—O3                   | 1.970(3)   | Zn1—N3                                 | 2.036(3)   |
| Zn1—O1 <sup>#2</sup>     | 2.009(3)   | Zn1—N8 <sup>#3</sup>                   | 2.039(3)   |
| O3—Zn1—O1 <sup>#2</sup>  | 105.44(13) | O3—Zn1—N8 <sup>#3</sup>                | 104.99(14) |
| O3—Zn1—N3                | 120.58(14) | O1 <sup>#2</sup> —Zn1—N8 <sup>#3</sup> | 124.86(14) |
| O1 <sup>#2</sup> —Zn1—N3 | 97.10(14)  | N3—Zn1—N8 <sup>#3</sup>                | 105.27(14) |

<sup>a</sup>Symmetry codes: #2:  $-x, -y+2, -z+1$ ; #3:  $-x+3/2, y+1/2, z$ .

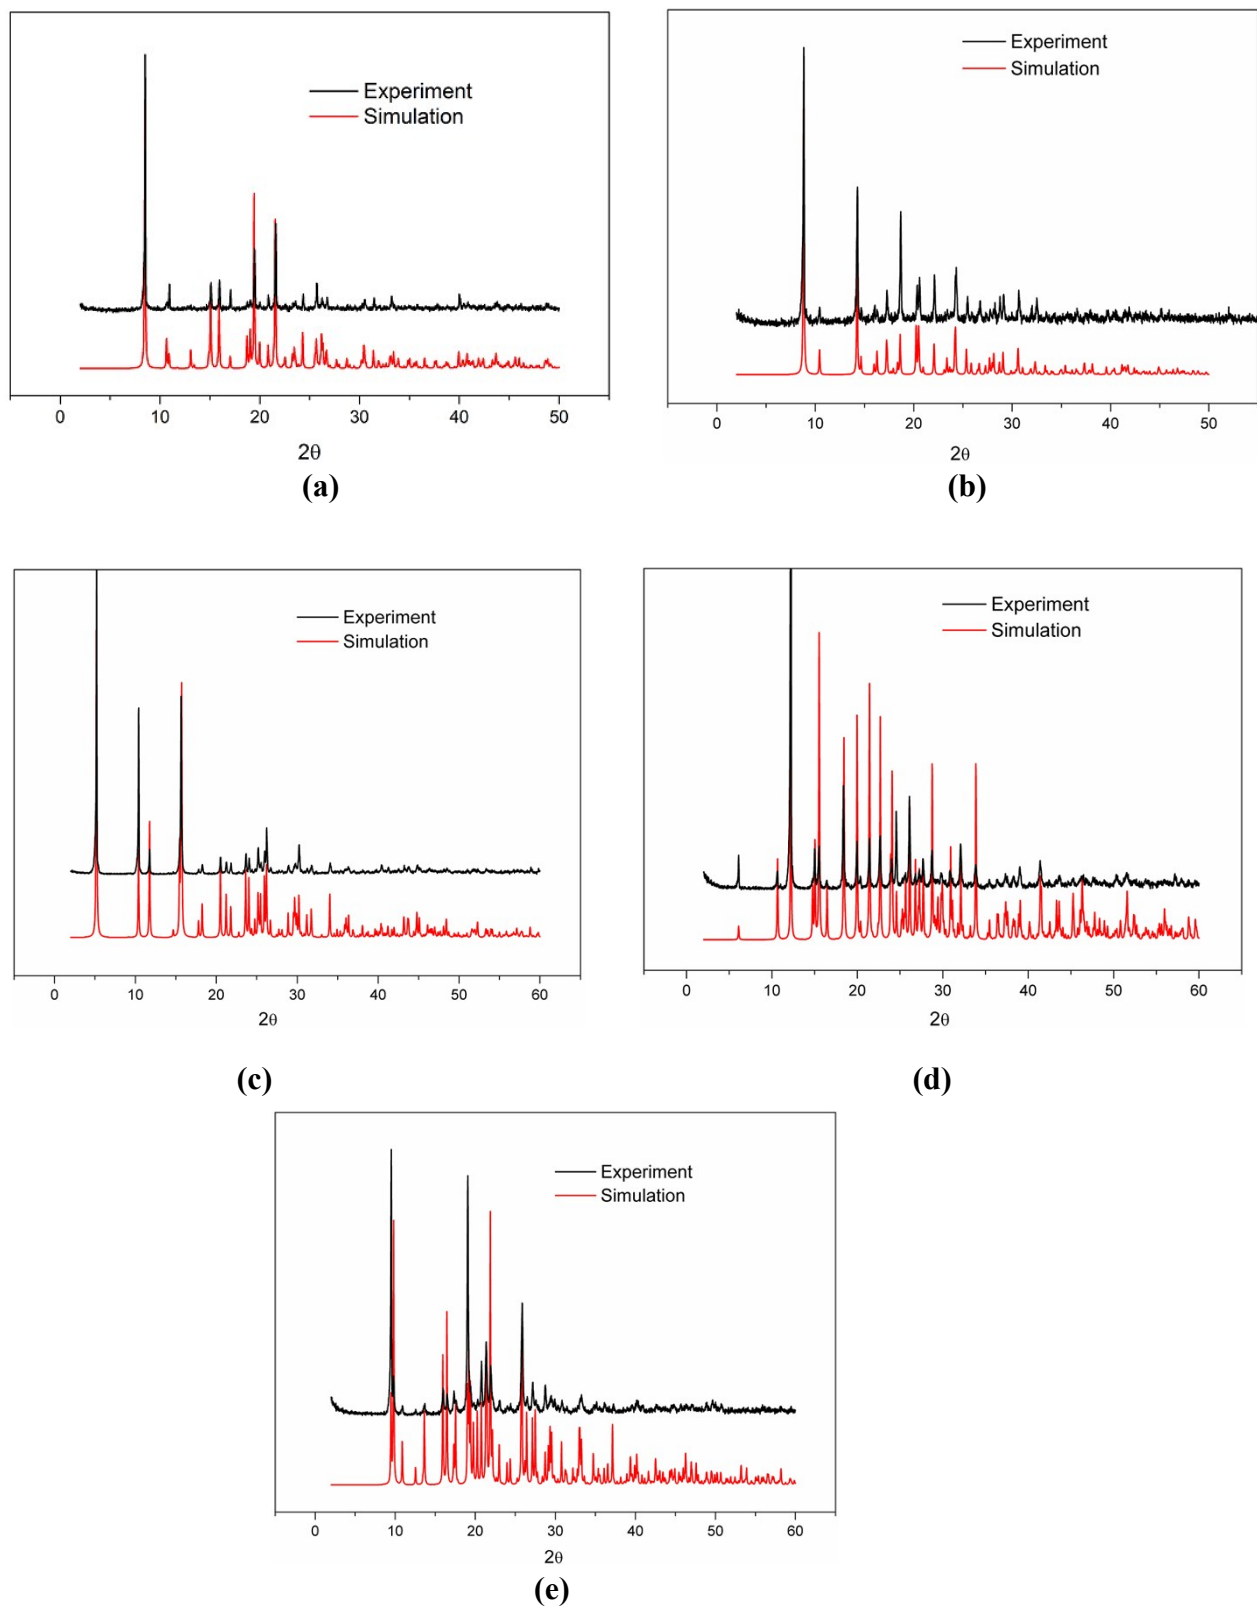

**Figure S1.** PXRD patterns of (a) **1**, (b) **2**, (c) **3**, (d) **4** and (e) **5**.

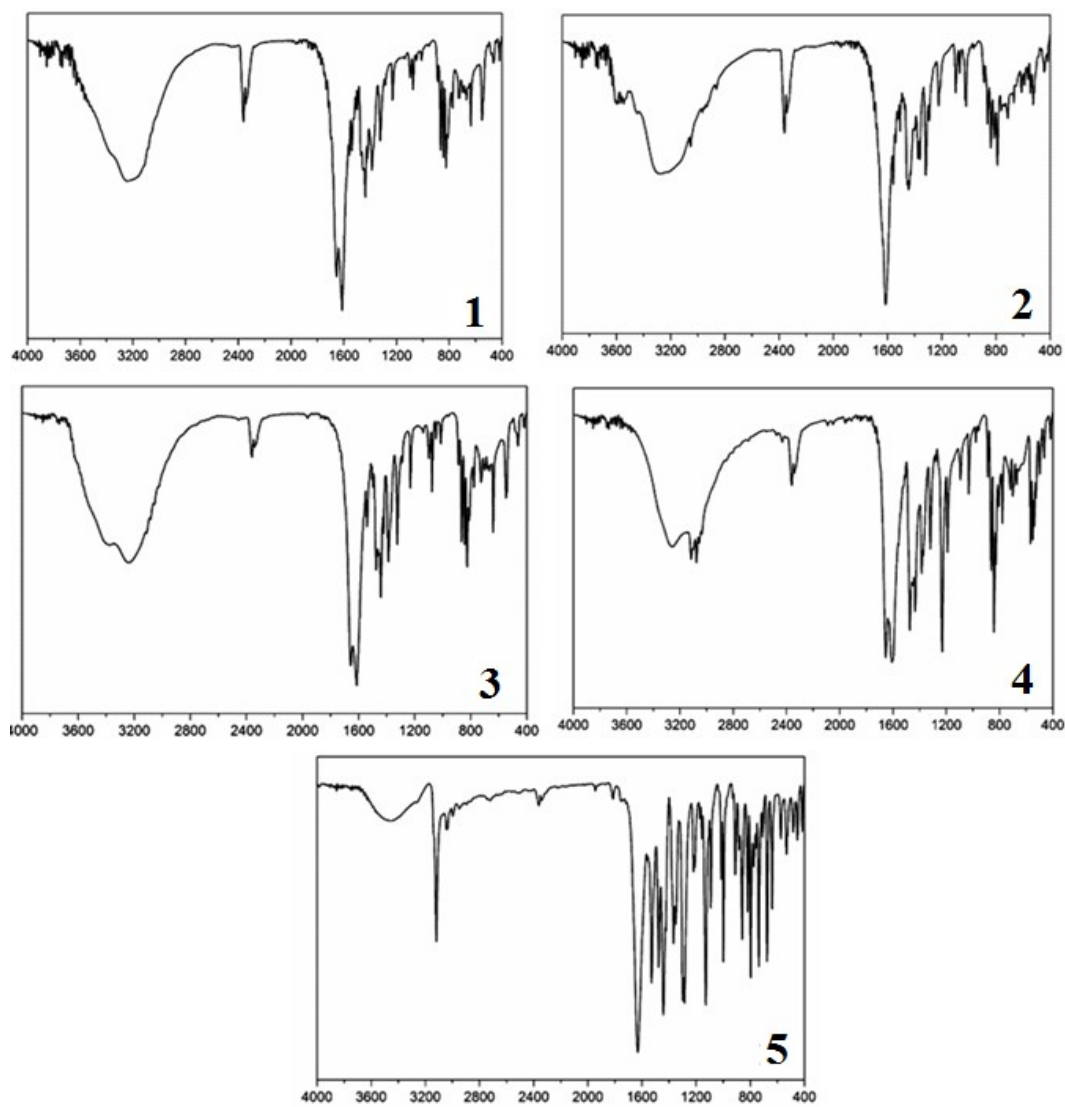

**Figure S2.** IR spectra of 1-5 (4000-400 cm<sup>-1</sup>).
